# Supplementary material for: Alternatives for the extraction of bioactives and biopolymers from Evernia prunastri for the formulation of antimicrobial bio-based films
Source: Royal Society of Chemistry journal article supplement (doi:10.1039/d4gc02741h), 2024-01-01
Supplement: d4gc02741h1.pdf [file d4gc02741h1.pdf]

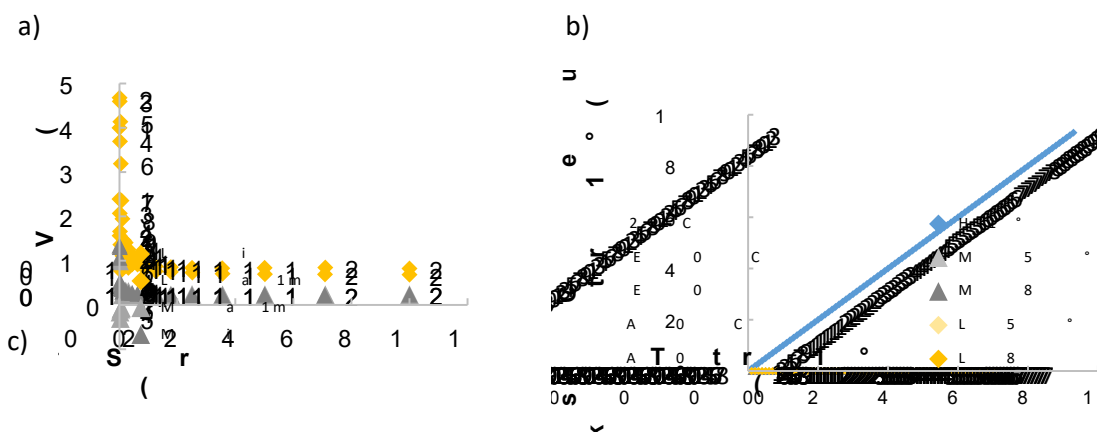

| Solvent  | $\lambda_{\max}$ absorption (nm)<br>NB in Water | $\lambda_{\max}$ absorption (nm)<br>NB in EtOH | Conductivity<br>(mS/cm) | Density<br>(g/cm <sup>3</sup> ) |
|----------|-------------------------------------------------|------------------------------------------------|-------------------------|---------------------------------|
| Water    | 638.21                                          | 635.42                                         | $0.05 \cdot 10^{-3}$    | 0.997                           |
| Ethanol  | 629.54                                          | 626.35                                         |                         | 0.789                           |
| Methanol | 628.24                                          | X                                              | $2 \cdot 10^{-3}$       | 0.791                           |
| LA:Gly:W | 639.39                                          | X                                              | 2.96                    | $1.21 \pm 0.01$                 |
| Men:Lau  | X                                               | 624.28                                         | $0.1 \cdot 10^{-3}$     | $0.87 \pm 0.02$                 |

**Figure S.1.** a) Apparent viscosity of the NaDES right after their synthesis and after one month at room temperature. b) Cumulative energy used to heat up to 170 °C water only and the NaDES at two different concentrations by microwave. Polarity through Nile Blue A spectrophotometric assay, conductivity, and density of the selected NaDES.

**Table S1.** Central composite design 1 NaDES LA:Gly:W on the carbohydrate content determined by the Anthrone method of the extract

|                           | Estimate  | Std. Error | t value | Pr(< abs (t) )         |           |
|---------------------------|-----------|------------|---------|------------------------|-----------|
| <b>INTERCEPT</b>          | 20.6009   | 1.2160     | 16.9418 | $3.903 \times 10^{-8}$ |           |
| <b>TEMPERATURE</b>        | 8.6522    | 1.4259     | 6.0681  | $1.863 \times 10^{-4}$ |           |
| <b>MULTIPLE R-SQUARED</b> | 0.8036    |            |         |                        |           |
| <b>ADJUSTED R-SQUARED</b> | 0.7818    |            |         |                        |           |
| <b>F- STATISTIC</b>       | 36.82     |            |         |                        |           |
| <b>P-VALUE</b>            | 0.0001863 |            |         |                        |           |
|                           | Df        | Sum Sq     | Mean Sq | F value                | Pr(>F)    |
| <b>F0(X2)</b>             | 1         | 598.89     | 598.89  | 36.8214                | 0.0001863 |
| <b>RESIDUALS</b>          | 9         | 146.38     | 16.26   |                        |           |
| <b>LACK OF FIT</b>        | 3         | 43.07      | 14.36   | 0.8338                 | 0.5223834 |
| <b>PURE ERROR</b>         | 6         | 103.31     | 17.22   |                        |           |

**Table S2.** Central composit design 1 NaDES LA:Gly:W on the carbohydrate content determined t HPLC

|                           | Estimate | Std. Error | t value | Pr(< abs (t) )         |         |
|---------------------------|----------|------------|---------|------------------------|---------|
| <b>INTERCEPT</b>          | 22.6482  | 1.3804     | 16.4065 | $5.167 \times 10^{-8}$ |         |
| <b>TEMPERATURE</b>        | 5.1794   | 1.6187     | 3.1997  | 0.01084                |         |
| <b>MULTIPLE R-SQUARED</b> | 0.5322   |            |         |                        |         |
| <b>ADJUSTED R-SQUARED</b> | 0.4802   |            |         |                        |         |
| <b>F- STATISTIC</b>       | 10.24    |            |         |                        |         |
| <b>P-VALUE</b>            | 0.01084  |            |         |                        |         |
|                           | Df       | Sum Sq     | Mean Sq | F value                | Pr(>F)  |
| <b>F0(X2)</b>             | 1        | 214.607    | 214.607 | 10.2381                | 0.01084 |
| <b>RESIDUALS</b>          | 9        | 188.655    | 20.962  |                        |         |
| <b>LACK OF FIT</b>        | 3        | 85.744     | 28.581  | 1.6664                 | 0.27191 |
| <b>PURE ERROR</b>         | 6        | 102.910    | 17.152  |                        |         |

**Table S3.** Central composit design 1 NaDES LA:Gly:W on the total protein content of the extrac

|                                | Estimate  | Std. Error | t value | Pr(< abs (t) )         |           |
|--------------------------------|-----------|------------|---------|------------------------|-----------|
| <b>INTERCEPT</b>               | 1.76412   | 0.15158    | 11.6384 | $2.424 \times 10^{-5}$ |           |
| <b>NWP</b>                     | 0.78125   | 0.12757    | 6.124   | 0.000866               |           |
| <b>TEMPERATURE</b>             | 1.17647   | 0.12757    | 9.222   | $9.174 \times 10^{-5}$ |           |
| <b>NWP *<br/>TEMPERATURE</b>   | 0.655     | 0.18041    | 3.6305  | 0.010958               |           |
| <b>TEMPERATURE<sup>2</sup></b> | 0.28559   | 0.14512    | 1.9679  | 0.096633               |           |
| <b>MULTIPLE R-<br/>SQUARED</b> | 0.9588    |            |         | 6                      |           |
| <b>ADJUSTED R-<br/>SQUARED</b> | 0.9313    |            |         |                        |           |
| <b>F- STATISTIC</b>            | 34.9      |            |         |                        |           |
| <b>P-VALUE</b>                 | 0.0002712 |            |         |                        |           |
|                                | Df        | Sum Sq     | Mean Sq | F value                | Pr(>F)    |
| <b>F0(X1, X2)</b>              | 2         | 15.9555    | 7.9777  | 61.2748                | 0.0001017 |
| <b>TWI(X1, X2)</b>             | 1         | 1.7161     | 1.7161  | 13.1809                | 0.0109580 |
| <b>PQ(X2)</b>                  | 1         | 0.5042     | 0.5042  | 3.8726                 | 0.0966335 |
| <b>RESIDUALS</b>               | 6         | 0.7812     | 0.1302  |                        |           |
| <b>LACK OF FIT</b>             | 4         | 0.6243     | 0.1561  | 1.9899                 | 0.361292  |
| <b>PURE ERROR</b>              | 2         | 0.1569     | 0.0784  |                        |           |

**Table S4.** Central composit design 1 NaDES LA:Gly:W on the TEAC value

|                                | Estimate  | Std. Error | t value | Pr(< abs (t) )         |          |
|--------------------------------|-----------|------------|---------|------------------------|----------|
| <b>INTERCEPT</b>               | 20.63471  | 0.96772    | 21.323  | $1.257 \times 10^{-7}$ |          |
| <b>NWP</b>                     | 3.22193   | 0.81446    | 3.9559  | 0.0054902              |          |
| <b>TEMPERATURE</b>             | 5.81627   | 0.81446    | 7.1413  | 0.0001868              |          |
| <b>TEMPERATURE<sup>2</sup></b> | -2.45147  | 0.92652    | -2.6459 | 0.0331388              |          |
| <b>MULTIPLE R-<br/>SQUARED</b> | 0.9132    |            |         |                        |          |
| <b>ADJUSTED R-<br/>SQUARED</b> | 0.876     |            |         |                        |          |
| <b>F- STATISTIC</b>            | 24.55     |            |         |                        |          |
| <b>P-VALUE</b>                 | 0.0004331 |            |         |                        |          |
|                                | Df        | Sum Sq     | Mean Sq | F value                | Pr(>F)   |
| <b>F0(X1, X2)</b>              | 2         | 353.68     | 176.839 | 33.3237                | 0.000264 |
| <b>PQ(X2)</b>                  | 1         | 37.15      | 37.151  | 7.0007                 | 0.033138 |
| <b>RESIDUALS</b>               | 7         | 37.15      | 5.307   |                        | 8        |
| <b>LACK OF FIT</b>             | 5         | 14.72      | 2.945   |                        | 0.901091 |
| <b>PURE ERROR</b>              | 2         | 22.42      | 11.212  | 0.2627                 | 1        |

**Table S5.** Central composite design 1 using Men:Lau on the TEAC value

|                                | Estimate  | Std. Error | t value | Pr(< abs (t) )           |           |
|--------------------------------|-----------|------------|---------|--------------------------|-----------|
| <b>INTERCEPT</b>               | 18.1318   | 1.99       | 15.1221 | 5.273 * 10 <sup>-6</sup> |           |
| <b>NWP</b>                     | -5.3402   | 1.0091     | -5.2919 | 0.0018441                |           |
| <b>TEMPERATURE</b>             | 8.3342    | 1.0091     | 8.2588  | 0.0001704                |           |
| <b>NWP *</b>                   | -3.5725   | 1.4271     | -2.5033 | 0.0463219                |           |
| <b>TEMPERATURE</b>             |           |            |         |                          |           |
| <b>TEMPERATURE<sup>2</sup></b> | 3.2763    | 1.148      | 2.854   | 0.0299292                |           |
| <b>MULTIPLE R-SQUARED</b>      | 0.9486    |            |         |                          |           |
| <b>ADJUSTED R-SQUARED</b>      | 0.9143    |            |         |                          |           |
| <b>F- STATISTIC</b>            | 27.66     |            |         |                          |           |
| <b>P-VALUE</b>                 | 0.0005237 |            |         |                          |           |
|                                | Df        | Sum Sq     | Mean Sq | F value                  | Pr(>F)    |
| <b>F0(X1, X2)</b>              | 2         | 783.81     | 391.90  | 48.1056                  | 0.0002023 |
| <b>TWI(X1, X2)</b>             | 1         | 51.05      | 51.05   | 6.2664                   | 0.0463219 |
| <b>PQ(X1)</b>                  | 1         | 66.36      | 66.36   | 8.1453                   | 0.0290292 |
| <b>RESIDUALS</b>               | 6         | 48.88      | 8.15    |                          |           |
| <b>LACK OF FIT</b>             | 4         | 47.58      | 11.89   | 18.2511                  | 0.526191  |
| <b>PURE ERROR</b>              | 2         | 1.30       | 0.65    |                          |           |

**Table S6.** Central composit design 2 NaDES LA:Gly:W on the total sugar content of the extract

|                                | Estimate                 | Std. Error | t value | Pr(< abs (t) )           |                          |
|--------------------------------|--------------------------|------------|---------|--------------------------|--------------------------|
| <b>INTERCEPT</b>               | 10.75941                 | 0.87703    | 12.2680 | 1.811 × 10 <sup>-6</sup> |                          |
| <b>TEMPERATURE</b>             | 16.03242                 | 0.73813    | 21.7203 | 2.128 × 10 <sup>-8</sup> |                          |
| <b>TEMPERATURE<sup>2</sup></b> | 8.06956                  | 0.83969    | 9.6101  | 1.141 × 10 <sup>-5</sup> |                          |
| <b>MULTIPLE R-SQUARED</b>      | 0.986                    |            |         |                          |                          |
| <b>ADJUSTED R-SQUARED</b>      | 0.9825                   |            |         |                          |                          |
| <b>F- STATISTIC</b>            | 282.1                    |            |         |                          |                          |
| <b>P-VALUE</b>                 | 3.823 × 10 <sup>-8</sup> |            |         |                          |                          |
|                                | Df                       | Sum Sq     | Mean Sq | F value                  | Pr(>F)                   |
| <b>F0(X2)</b>                  | 1                        | 2056.31    | 2056.31 | 471.7727                 | 2.128 × 10 <sup>-8</sup> |
| <b>PQ(X2)</b>                  | 1                        | 402.55     | 402.55  | 92.3550                  | 1.141 × 10 <sup>-5</sup> |
| <b>RESIDUALS</b>               | 8                        | 34.87      | 4.36    |                          |                          |

|                    |   |       |      |        |        |
|--------------------|---|-------|------|--------|--------|
| <b>LACK OF FIT</b> | 2 | 4.55  | 2.27 | 0.4499 | 0.6576 |
| <b>PURE ERROR</b>  | 6 | 30.32 | 5.05 |        |        |

**Table S7.** Central composit design 2 NaDES LA:Gly:W on the carbohydrate content determined b

|                                | Estimate               | Std. Error | t value | Pr(< abs (t) )         |                        |
|--------------------------------|------------------------|------------|---------|------------------------|------------------------|
| <b>INTERCEPT</b>               | 13.62118               | 0.7689     | 17.7142 | $1.055 \times 10^{-7}$ |                        |
| <b>TEMPERATURE</b>             | 12.50062               | 0.6471     | 19.3161 | $5.354 \times 10^{-8}$ |                        |
| <b>TEMPERATURE<sup>2</sup></b> | 3.96588                | 0.7362     | 5.3869  | $6.562 \times 10^{-4}$ |                        |
| <b>MULTIPLE R-SQUARED</b>      | 0.9805                 |            |         |                        |                        |
| <b>ADJUSTED R-SQUARED</b>      | 0.9756                 |            |         |                        |                        |
| <b>F- STATISTIC</b>            | 201.1                  |            |         |                        |                        |
| <b>P-VALUE</b>                 | $1.448 \times 10^{-7}$ |            |         |                        |                        |
|                                | Df                     | Sum Sq     | Mean Sq | F value                | Pr(>F)                 |
| <b>F0(X2)</b>                  | 1                      | 1250.1     | 1250.12 | 373.1113               | $5.354 \times 10^{-8}$ |
| <b>PQ(X2)</b>                  | 1                      | 97.23      | 97.23   | 29.0189                | $6.562 \times 10^{-5}$ |
| <b>RESIDUALS</b>               | 8                      | 26.80      | 3.35    |                        |                        |
| <b>LACK OF FIT</b>             | 2                      | 3.63       | 1.82    | 0.4699                 | 0.6463                 |
| <b>PURE ERROR</b>              | 6                      | 23.17      | 3.86    |                        |                        |

**Table S8.** Central composit design 2 NaDES LA:Gly:W on the total protein content of the extrac

|                           | Estimate  | Std. Error | t value | Pr(< abs (t) )         |           |
|---------------------------|-----------|------------|---------|------------------------|-----------|
| <b>INTERCEPT</b>          | 0.477273  | 0.056717   | 8.4151  | $3.029 \times 10^{-5}$ |           |
| <b>NWP</b>                | 0.140119  | 0.066506   | 2.1069  | 0.0682052              |           |
| <b>TEMPERATURE</b>        | 0.438759  | 0.066506   | 6.5973  | $1.699 \times 10^{-4}$ |           |
| <b>MULTIPLE R-SQUARED</b> | 0.857     |            |         |                        |           |
| <b>ADJUSTED R-SQUARED</b> | 0.8213    |            |         |                        |           |
| <b>F- STATISTIC</b>       | 23.98     |            |         |                        |           |
| <b>P-VALUE</b>            | 0.0004176 |            |         |                        |           |
|                           | Df        | Sum Sq     | Mean Sq | F value                | Pr(>F)    |
| <b>F0(X1, X2)</b>         | 2         | 1.69714    | 0.84857 | 23.9815                | 0.0004176 |

|                    |   |         |         |        |          |
|--------------------|---|---------|---------|--------|----------|
| <b>RESIDUALS</b>   | 8 | 0.28308 | 0.03538 |        |          |
| <b>LACK OF FIT</b> | 6 | 0.26301 | 0.04383 | 4.3689 | 0.197944 |
| <b>PURE ERROR</b>  | 2 | 0.02007 | 0.01003 |        |          |

**Table S9.** Central composit design 2 NaDES LA:Gly:W on the TEAC value.

|                           | Estimate  | Std. Error | t value | Pr(< abs (t) )         |           |
|---------------------------|-----------|------------|---------|------------------------|-----------|
| <b>INTERCEPT</b>          | 7.91091   | 0.85347    | 9.2691  | $6.705 \times 10^{-6}$ |           |
| <b>TEMPERATURE</b>        | 5.51379   | 1.00078    | 5.5095  | $3.756 \times 10^{-4}$ |           |
| <b>MULTIPLE R-SQUARED</b> | 0.7713    |            |         |                        |           |
| <b>ADJUSTED R-SQUARED</b> | 0.7459    |            |         |                        |           |
| <b>F- STATISTIC</b>       | 30.35     |            |         |                        |           |
| <b>P-VALUE</b>            | 0.0003756 |            |         |                        |           |
|                           | Df        | Sum Sq     | Mean Sq | F value                | Pr(>F)    |
| <b>F0(X2)</b>             | 1         | 243.215    | 243.215 | 30.354                 | 0.0003756 |
| <b>RESIDUALS</b>          | 9         | 72.113     | 8.013   |                        |           |
| <b>LACK OF FIT</b>        | 3         | 31.623     | 10.541  | 1.562                  | 0.2933871 |
| <b>PURE ERROR</b>         | 6         | 40.490     | 6.748   |                        |           |

**Table S10.** Central composit design 2 NaDES Men:Lau on the total sugar content of the extract.

|                                | Estimate | Std. Error | t value | Pr(< abs (t) )             |
|--------------------------------|----------|------------|---------|----------------------------|
| <b>INTERCEPT</b>               | 10.46000 | 0.43288    | 24.1640 | 2.<br>$262 \times 10^{-6}$ |
| <b>NWP</b>                     | 2.31249  | 0.26508    | 8.7237  | $3.277 \times 10^{-4}$     |
| <b>TEMPERATURE</b>             | 10.18153 | 0.26508    | 38.4091 | $2.254 \times 10^{-7}$     |
| <b>NWP *</b>                   | 2.28750  | 0.37488    | 6.1019  | 0.0017119                  |
| <b>TEMPERATURE</b>             |          |            |         |                            |
| <b>NWP<sup>2</sup></b>         | 0.75188  | 0.31551    | 2.3831  | 0.0629268                  |
| <b>TEMPERATURE<sup>2</sup></b> | 3.70188  | 0.31551    | 11.7330 | $7.907 \times 10^{-5}$     |
| <b>MULTIPLE R-SQUARED</b>      | 0.9971   |            |         |                            |
| <b>ADJUSTED R-SQUARED</b>      | 0.9942   |            |         |                            |

|                     |                        |        |         |          |                       |
|---------------------|------------------------|--------|---------|----------|-----------------------|
| <b>F- STATISTIC</b> | 345.5                  |        |         |          |                       |
| <b>P-VALUE</b>      | $2.423 \times 10^{-6}$ |        |         |          |                       |
|                     | Df                     | Sum Sq | Mean Sq | F value  | Pr(>F)                |
| <b>F0(X1, X2)</b>   | 2                      | 872.09 | 436.04  | 775.6822 | $5.85 \times 10^{-7}$ |
| <b>TWI(X1, X2)</b>  | 1                      | 20.93  | 20.93   | 37.2336  | 0.001712              |
| <b>PQ(X1, X2)</b>   | 2                      | 78.09  | 39.04   | 69.4559  | $2.25 \times 10^{-4}$ |
| <b>RESIDUALS</b>    | 5                      | 2.81   | 0.56    |          |                       |
| <b>LACK OF FIT</b>  | 3                      | 2.55   | 0.85    | 6.5458   | 0.135393              |
| <b>PURE ERROR</b>   | 2                      | 0.26   | 0.13    |          |                       |

**Table S11.** Central composit design 2 NaDES MEN:LAU on the polymer extraction yield

|                           |                        |            |         |                         |                        |
|---------------------------|------------------------|------------|---------|-------------------------|------------------------|
|                           | Estimate               | Std. Error | t value | Pr(< abs (t) )          |                        |
| <b>INTERCEPT</b>          | 14.71855               | 0.34008    | 43.280  | $9.371 \times 10^{-12}$ |                        |
| <b>TEMPERATURE</b>        | 9.39346                | 0.39878    | 23.556  | $2.135 \times 10^{-9}$  |                        |
| <b>MULTIPLE R-SQUARED</b> | 0.984                  |            |         |                         |                        |
| <b>ADJUSTED R-SQUARED</b> | 0.9823                 |            |         |                         |                        |
| <b>F- STATISTIC</b>       | 554.9                  |            |         |                         |                        |
| <b>P-VALUE</b>            | $2.135 \times 10^{-9}$ |            |         |                         |                        |
|                           | Df                     | Sum Sq     | Mean Sq | F value                 | Pr(>F)                 |
| <b>F0(X2)</b>             | 1                      | 705.90     | 705.90  | 554.8732                | $2.135 \times 10^{-9}$ |
| <b>RESIDUALS</b>          | 9                      | 11.45      | 1.27    |                         |                        |
| <b>LACK OF FIT</b>        | 3                      | 6.85       | 2.28    | 2.9736                  | 0.1187                 |
| <b>PURE ERROR</b>         | 6                      | 4.60       | 0.77    |                         |                        |

**Table S.12.** Central composit design 2 NaDES Men:Lau on the TEAC value

|                           |                        |            |         |                        |
|---------------------------|------------------------|------------|---------|------------------------|
|                           | Estimate               | Std. Error | t value | Pr(< abs (t) )         |
| <b>INTERCEPT</b>          | 11.56909               | 0.40899    | 28.287  | $2.636 \times 10^{-9}$ |
| <b>NWR</b>                | -1.26972               | 0.47958    | -2.6476 | 0.029337               |
| <b>TEMPERATURE</b>        | 6.03499                | 0.47958    | 12.583  | $1.491 \times 10^{-6}$ |
| <b>MULTIPLE R-SQUARED</b> | 0.9539                 |            |         |                        |
| <b>ADJUSTED R-SQUARED</b> | 0.9423                 |            |         |                        |
| <b>F- STATISTIC</b>       | 82.68                  |            |         |                        |
| <b>P-VALUE</b>            | $4.535 \times 10^{-6}$ |            |         |                        |

|                    | Df | Sum Sq  | Mean Sq | F value | Pr(>F)                 |
|--------------------|----|---------|---------|---------|------------------------|
| <b>F0(X1, X2)</b>  | 2  | 304.267 | 152.133 | 82.6817 | $4.535 \times 10^{-6}$ |
| <b>RESIDUALS</b>   | 8  | 14.720  | 1.840   |         |                        |
| <b>LACK OF FIT</b> | 6  | 11.596  | 1.933   | 1.2373  | 0.5111                 |
| <b>PURE ERROR</b>  | 2  | 3.124   | 1.562   |         |                        |

**Table S.13.** Experimental design matrix and dependent variables related to the rheological characterization of the biopolymer recovered from the aqueous phase after the hydrothermal extraction with Men:Lau at low percentages.

| Exp | Uncoded variable |           | Coded variable |       | Men:Lau                         |                                       |                                       |                       |
|-----|------------------|-----------|----------------|-------|---------------------------------|---------------------------------------|---------------------------------------|-----------------------|
|     | NP (%)           | Temp (°C) | X1             | X2    | Viscosity <sub>1s</sub> (mPa·s) | Elastic modulus <sub>10 Hz</sub> (Pa) | Viscous modulus <sub>10 Hz</sub> (Pa) | $\tan \delta_{10 Hz}$ |
| 1   | 15               | 120       | 1              | -1    | 100962                          | 1938.7                                | 381.18                                | 0.20                  |
| 2   | 17               | 145       | 1.41           | 0     | 19344                           | 230.65                                | 156.22                                | 0.68                  |
| 3   | 10               | 145       | 0              | 0     | 19344                           | 235.61                                | 183.91                                | 0.78                  |
| 4   | 10               | 110       | 0              | -1.41 | 116523                          | 3588.4                                | 502.59                                | 0.14                  |
| 5   | 5                | 170       | -1             | 1     | 17766                           | 240.82                                | 87.209                                | 0.36                  |
| 6   | 5                | 120       | -1             | -1    | 827504                          | 13574                                 | 1569.3                                | 0.12                  |
| 7   | 15               | 170       | 1              | 1     | 25702                           | 119.32                                | 55.678                                | 0.47                  |
| 8   | 10               | 180       | 0              | 1.41  | 114.2                           | Too liquid to measure                 |                                       |                       |
| 9   | 3                | 145       | -1.41          | 0     | 15269                           | 105.61                                | 93.226                                | 0.88                  |
| 10  | 10               | 145       | 0              | 0     | 19695                           | 169.5                                 | 99.672                                | 0.59                  |
| 11  | 10               | 145       | 0              | 0     | 32058                           | 405.24                                | 173.15                                | 0.43                  |

**Table S.14.** Central composit design 2 NaDES Men:Lau on the polymer logarithm of the viscous modulus

|                           | Estimate | Std. Error | t value | Pr(< abs (t) )         |
|---------------------------|----------|------------|---------|------------------------|
| <b>INTERCEPT</b>          | 2.217518 | 0.076444   | 29.0086 | $2.159 \times 10^{-9}$ |
| <b>TEMPERATURE</b>        | -0.46244 | 0.098688   | -4.6859 | 0.00157                |
| <b>MULTIPLE R-SQUARED</b> | 0.733    |            |         |                        |
| <b>ADJUSTED R-SQUARED</b> | 0.6996   |            |         |                        |



|                     |         |         |         |         |         |
|---------------------|---------|---------|---------|---------|---------|
| <b>F- STATISTIC</b> | 21.96   |         |         |         |         |
| <b>P-VALUE</b>      | 0.00157 |         |         |         |         |
|                     | Df      | Sum Sq  | Mean Sq | F value | Pr(>F)  |
| <b>F0(X2)</b>       | 1       | 1.24033 | 1.24033 | 21.957  | 0.00157 |
| <b>RESIDUALS</b>    | 8       | 0.45191 | 0.05649 |         |         |
| <b>LACK OF FIT</b>  | 2       | 0.16715 | 0.08358 | 1.761   | 0.25019 |
| <b>PURE ERROR</b>   | 6       | 0.28475 | 0.04746 |         |         |

**Table S.15.** Central composit design 2 NaDES Men:Lau on the polymer logarithm of the elastic modulus

|                           |          |            |         |                           |          |
|---------------------------|----------|------------|---------|---------------------------|----------|
|                           | Estimate | Std. Error | t value | Pr(< abs (t) )            |          |
| <b>INTERCEPT</b>          | 2.60133  | 0.14083    | 18.4718 | 7.602<br>$\times 10^{-8}$ |          |
| <b>TEMPERATURE</b>        | -0.71839 | 0.18181    | -3.9514 | 0.004228                  |          |
| <b>MULTIPLE R-SQUARED</b> | 0.6612   |            |         |                           |          |
| <b>ADJUSTED R-SQUARED</b> | 0.6189   |            |         |                           |          |
| <b>F- STATISTIC</b>       | 15.61    |            |         |                           |          |
| <b>P-VALUE</b>            | 0.004228 |            |         |                           |          |
|                           | Df       | Sum Sq     | Mean Sq | F value                   | Pr(>F)   |
| <b>F0(X2)</b>             | 1        | 2.99332    | 2.99332 | 15.6136                   | 0.004228 |
| <b>RESIDUALS</b>          | 8        | 1.53370    | 0.19171 |                           |          |
| <b>LACK OF FIT</b>        | 2        | 0.94663    | 0.47332 | 4.8374                    | 0.56085  |
| <b>PURE ERROR</b>         | 6        | 0.58707    | 0.09785 |                           |          |

**Table S.16.** Central composit design 2 NaDES Men:Lau on the polymer logarithm of viscosity

|                           |          |            |         |                            |
|---------------------------|----------|------------|---------|----------------------------|
|                           | Estimate | Std. Error | t value | Pr(< abs (t) )             |
| <b>INTERCEPT</b>          | 4.38572  | 0.34008    | 43.280  | 9.371<br>$\times 10^{-12}$ |
| <b>TEMPERATURE</b>        | -0.81467 | 0.39878    | 23.556  | $2.135 \times 10^{-9}$     |
| <b>MULTIPLE R-SQUARED</b> | 0.6089   |            |         |                            |
| <b>ADJUSTED R-</b>        | 0.5655   |            |         |                            |

|                     |           |               |                |                |                  |
|---------------------|-----------|---------------|----------------|----------------|------------------|
| <b>SQUARED</b>      |           |               |                |                |                  |
| <b>F- STATISTIC</b> | 14.01     |               |                |                |                  |
| <b>P-VALUE</b>      | 0.004601  |               |                |                |                  |
|                     | <b>Df</b> | <b>Sum Sq</b> | <b>Mean Sq</b> | <b>F value</b> | <b>Pr(&gt;F)</b> |
| <b>F0(X2)</b>       | 1         | 5.3095        | 5.3095         | 14.014         | 0.004601         |
| <b>RESIDUALS</b>    | 9         | 3.4100        | 0.3789         |                |                  |
| <b>LACK OF FIT</b>  | 3         | 2.9228        | 0.9743         | 11.999         | 0.006026         |
| <b>PURE ERROR</b>   | 6         | 0.04872       | 0.0812         |                |                  |

---
